# Supplementary material for: Visible-light-driven photocatalytic selective oxidation of amines and sulfides over a vanadium metal–organic framework
Source: Royal Society of Chemistry journal article supplement (doi:10.1039/d2se01152b), 2022-01-01
Supplement: d2se01152b1.pdf [file d2se01152b1.pdf]

## Supplementary material

### Visible-light-driven photocatalytic selective oxidation of amines and sulfides over a vanadium metal-organic framework

Ke Guo,<sup>†ad</sup> Guang'an Jie,<sup>†a</sup> Jiahui Liu,<sup>a</sup> Yanghe Fu,<sup>\*ab</sup> Rui Ma,<sup>ab</sup> Xinqing Lu,<sup>ab</sup>

Fumin Zhang,<sup>ab</sup> Weidong Zhu<sup>\*ab</sup> and Maohong Fan<sup>\*c</sup>

<sup>a</sup> Key Laboratory of the Ministry of Education for Advanced Catalysis Materials, Institute of Physical Chemistry, Zhejiang Normal University, Jinhua 321004, People's Republic of China

<sup>b</sup> Zhejiang Engineering Laboratory for Green Syntheses and Applications of Fluorine-Containing Specialty Chemicals, Institute of Advanced Fluorine-Containing Materials, Zhejiang Normal University, Jinhua 321004, People's Republic of China

<sup>c</sup> Department of Chemical and Petroleum Engineering, University of Wyoming, Laramie, WY 82071, United States of America

<sup>d</sup> School of Energy and Power Engineering, Nanjing University of Science and Technology, Nanjing 210094, People's Republic of China

---

<sup>†</sup>These authors contributed equally to this work.

\*Corresponding authors:

E-mail addresses: [yhfu@zjnu.cn](mailto:yhfu@zjnu.cn) (Y. Fu), [weidongzhu@zjnu.cn](mailto:weidongzhu@zjnu.cn) (W. Zhu), and [mfan@uwyo.edu](mailto:mfan@uwyo.edu) (M. Fan).

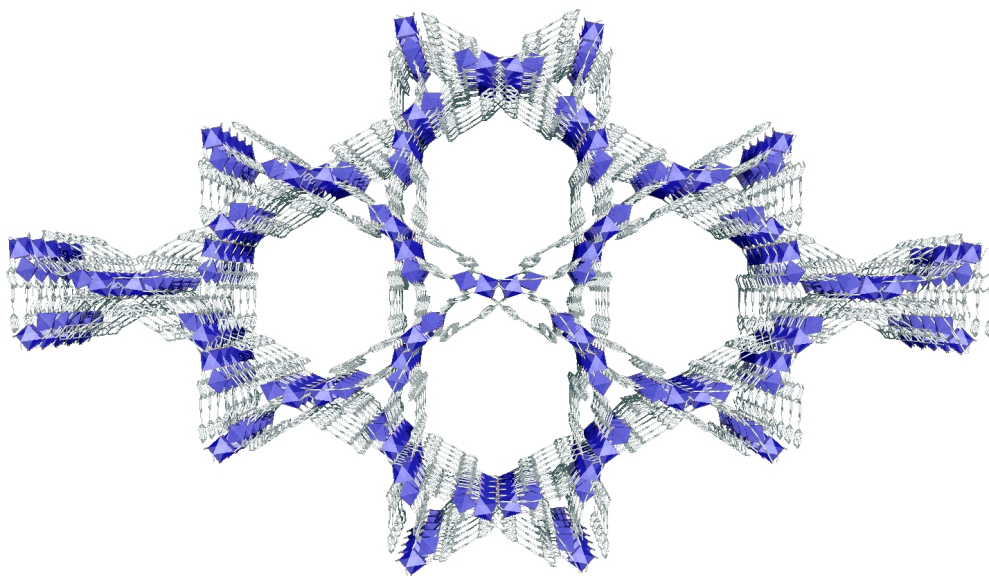

**Fig. S1.** Structure of BIT-66.

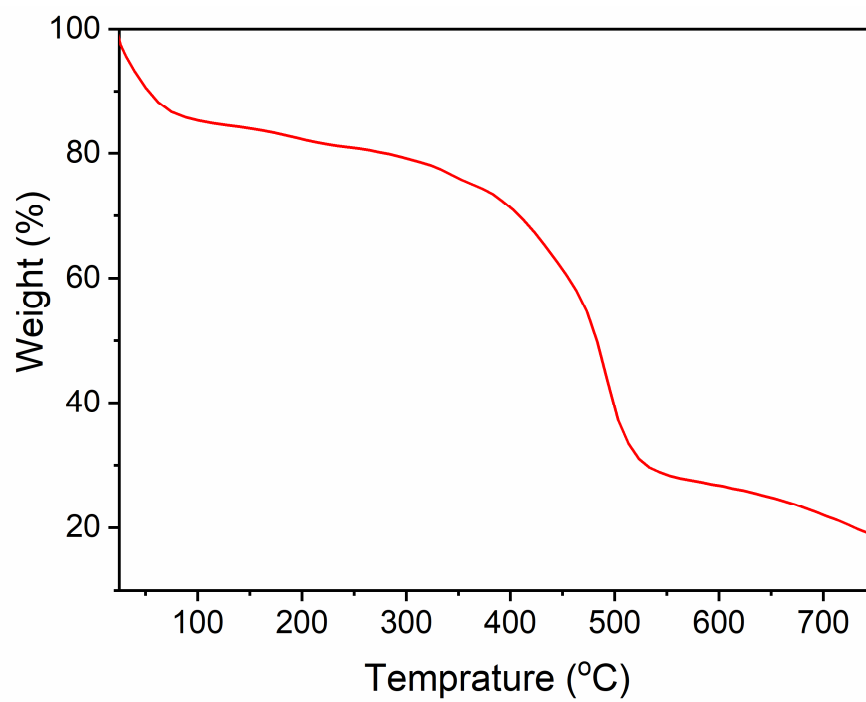

**Fig. S2.** TGA curve of the as-synthesized BIT-66.

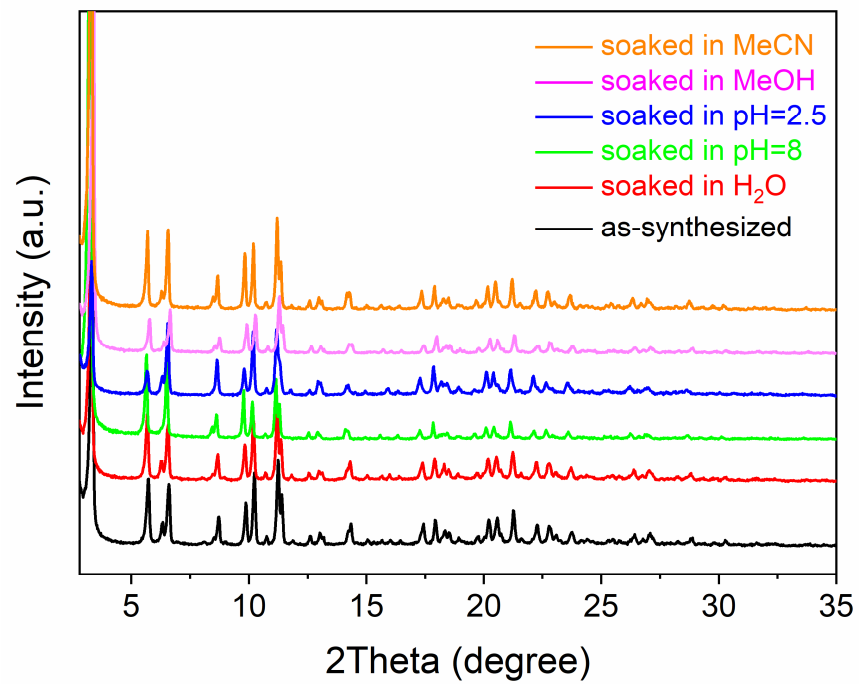

**Fig. S3.** PXRD patterns of the prepared BIT-66 after immersing in different solutions for 12 h.

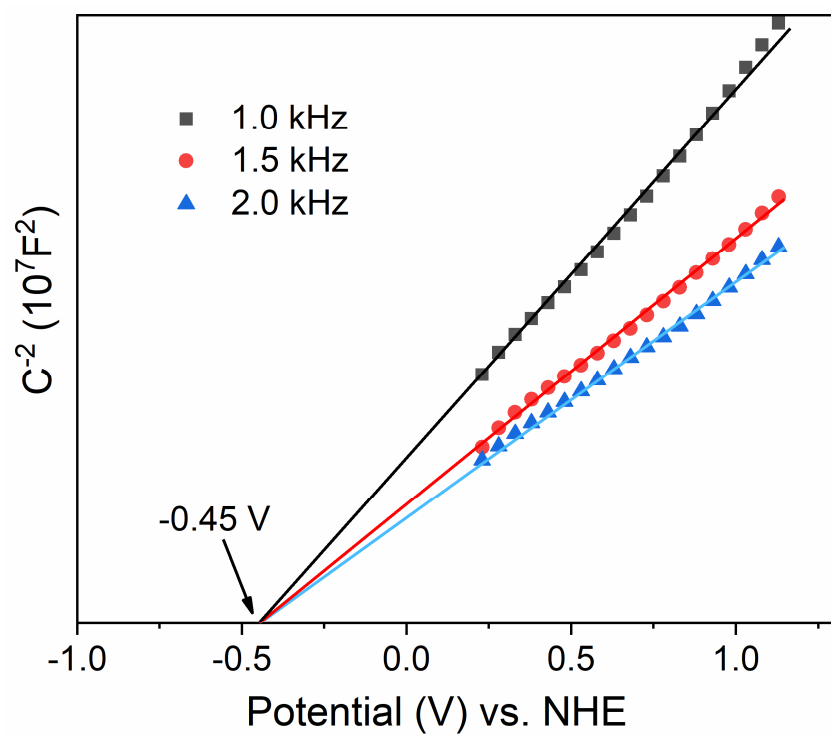

**Fig. S4.** Mott-Schottky plots of the as-synthesized BIT-66.

**Table S1.** Photocatalytic oxidative coupling of benzylamine under various reaction conditions<sup>a</sup>

| Entry          | Solvent          | Oxidant                       | Light | Conv. (%) | Sel. (%)       |
|----------------|------------------|-------------------------------|-------|-----------|----------------|
| 1              | MeCN             | O <sub>2</sub>                | On    | 85        | 99             |
| 2              | DMF              | O <sub>2</sub>                | On    | 70        | 99             |
| 3              | H <sub>2</sub> O | O <sub>2</sub>                | On    | 16        | 99             |
| 4              | Toluene          | O <sub>2</sub>                | On    | 20        | 99             |
| 5              | MeCN             | Ar                            | On    | 7.6       | - <sup>b</sup> |
| 6              | MeCN             | O <sub>2</sub>                | Off   | -         | -              |
| 7 <sup>c</sup> | MeCN             | O <sub>2</sub>                | On    | -         | -              |
| 8 <sup>d</sup> | MeCN             | H <sub>2</sub> O <sub>2</sub> | Off   | -         | -              |
| 9 <sup>d</sup> | MeCN             | H <sub>2</sub> O <sub>2</sub> | On    | 7.9       | -              |

<sup>a</sup> Reaction conditions: 5 mg of BIT-66, 0.5 mmol of benzylamine, 5 mL of solvent, 12 h of visible light irradiation ( $800 \text{ nm} \geq \lambda \geq 420 \text{ nm}$ ).

<sup>b</sup> No detected.

<sup>c</sup> Without BIT-66.

<sup>d</sup> 15 mM H<sub>2</sub>O<sub>2</sub> was used under Ar atmosphere.

**Table S2.** Photocatalytic oxidative coupling of benzylamine over different pure MOFs

photocatalysts under visible light irradiation

| Entry | Photocatalyst                                          | Oxidant        | TOF (h <sup>-1</sup> ) <sup>a</sup> | Ref.      |
|-------|--------------------------------------------------------|----------------|-------------------------------------|-----------|
| 1     | NH <sub>2</sub> -MIL-125(Ti)                           | O <sub>2</sub> | 2.0                                 | [1]       |
| 2     | Cd(dcbpy)                                              | Air            | 2.4                                 | [2]       |
| 3     | ZJU-56                                                 | O <sub>2</sub> | 3.5                                 | [3]       |
| 4     | Zn-bpydc                                               | Air            | 4.2                                 | [4]       |
| 5     | BIT-66                                                 | O <sub>2</sub> | 7.7                                 | This work |
| 6     | FJI-Y10                                                | O <sub>2</sub> | 8.3                                 | [5]       |
| 7     | In-ADBEB                                               | O <sub>2</sub> | 11.0                                | [6]       |
| 8     | PCN-222                                                | Air            | 24.6                                | [7]       |
| 9     | Zn <sub>3</sub> (OH) <sub>2</sub> (ADBEB) <sub>2</sub> | O <sub>2</sub> | 45.8                                | [8]       |

<sup>a</sup> The turnover frequency (TOF) values were calculated as the moles of the converted benzylamine divided by the moles of photocatalyst and the reaction time.

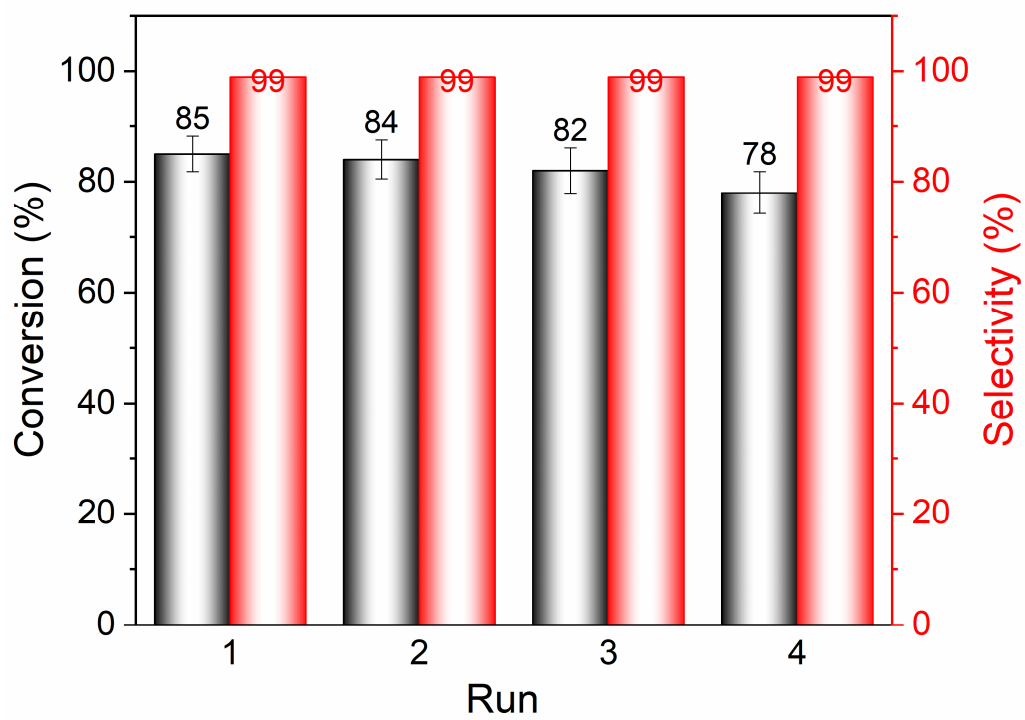

**Fig. S5.** Reusability of BIT-66 in the photocatalytic oxidative coupling of benzylamine upon visible-light irradiation.



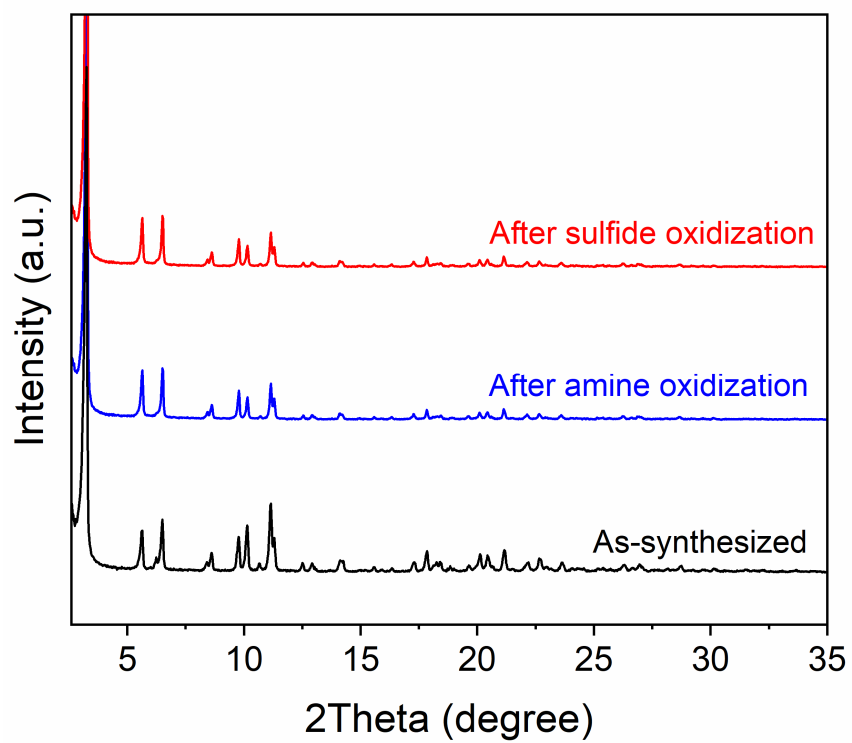

**Fig. S6.** PXRD patterns of the fresh and the used BIT-66 after the 4<sup>th</sup>-run photocatalytic reaction.

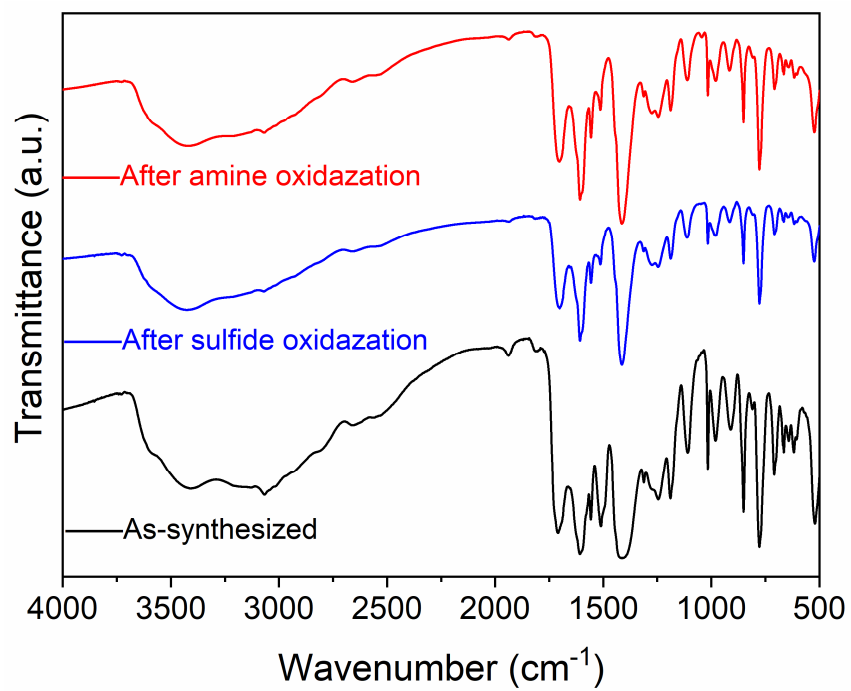

**Fig. S7.** FT-IR spectra of the fresh and the used BIT-66 after the 4<sup>th</sup>-run photocatalytic reaction.

**Table S3.** Photocatalytic oxidation of thioanisole under various reaction conditions<sup>a</sup>

| Entry          | Solvent          | Oxidant                       | Conv. (%) | Sel. (%) |
|----------------|------------------|-------------------------------|-----------|----------|
| 1              | MeCN             | O <sub>2</sub>                | -         | -        |
| 2              | MeCN             | H <sub>2</sub> O <sub>2</sub> | 90        | 53       |
| 3              | MeCN             | TBHP                          | 97        | 98       |
| 4              | MeOH             | TBHP                          | 80        | 98       |
| 5              | H <sub>2</sub> O | TBHP                          | 32        | 98       |
| 6 <sup>b</sup> | MeCN             | TBHP                          | -         | -        |
| 7 <sup>c</sup> | MeCN             | TBHP                          | 9         | 98       |

<sup>a</sup> Reaction conditions: 5 mg of BIT-66, 1.5 mmol of thioanisole, 1.5 mmol of oxidant, 5 mL of solvent, 3 h of visible light irradiation ( $800 \text{ nm} \geq \lambda \geq 420 \text{ nm}$ ).

<sup>b</sup> Without BIT-66.

<sup>c</sup> In dark.

**Table S4.** Photocatalytic oxygenation of thioanisole over different pure MOFs photocatalysts under visible light irradiation<sup>a</sup>

| Entry | Photocatalyst                                  | Oxidant                       | TOF (h <sup>-1</sup> ) <sup>a</sup> | Ref.      |
|-------|------------------------------------------------|-------------------------------|-------------------------------------|-----------|
| 1     | PCN-222(Zr)                                    | Air                           | 1.5                                 | [9]       |
| 2     | DUT-67(Zr)                                     | O <sub>2</sub>                | 1.9                                 | [10]      |
| 3     | CoMo-TPT                                       | O <sub>2</sub>                | 2.6                                 | [11]      |
| 4     | Zr <sub>6</sub> -IrbpyOMe                      | O <sub>2</sub>                | 3.4                                 | [12]      |
| 5     | Zr <sub>12</sub> -NBC                          | Air                           | 5.0                                 | [13]      |
| 6     | Zr-TCA                                         | Air                           | 5.0                                 | [14]      |
| 7     | Bi-PMOF                                        | O <sub>2</sub>                | 6.3                                 | [15]      |
| 8     | In-ADBEB                                       | H <sub>2</sub> O <sub>2</sub> | 14.7                                | [6]       |
| 9     | [Ru(bpy) <sub>3</sub> ]Cl <sub>2</sub> -UiO-67 | Air                           | 16.6                                | [16]      |
| 10    | UNLPF-10                                       | Air                           | 103.9                               | [17]      |
| 11    | BIT-66                                         | TBHP                          | 105.7                               | This work |

<sup>a</sup> The turnover frequency (TOF) values were calculated as the moles of the converted thioanisole divided by the moles of photocatalyst and the reaction time.

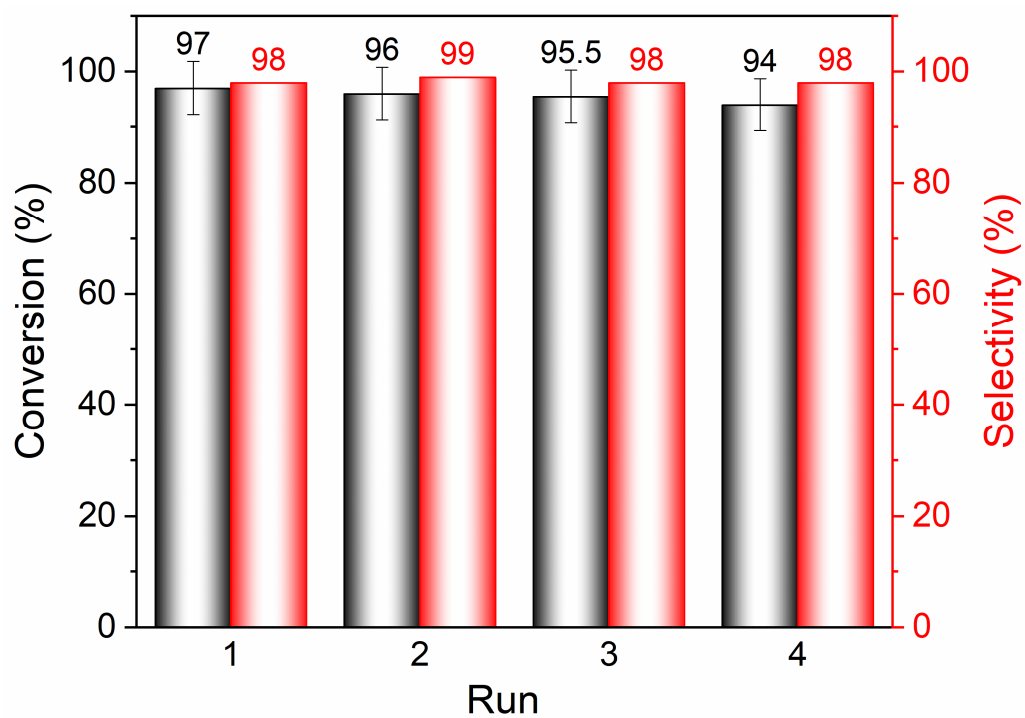

**Fig. S8.** Reusability of BIT-66 in the photocatalytic oxygenation of thioanisole upon visible-light irradiation.

**Table S5.** Quenching experiments for the photocatalytic oxidation of benzylamine and thioanisole<sup>a</sup>

| Entry | Substrate   | Oxidant        | Scavenger         | Inhibited species            | Conv. (%) |
|-------|-------------|----------------|-------------------|------------------------------|-----------|
| 1     | Benzylamine | O <sub>2</sub> | -                 | -                            | 85        |
| 2     |             | O <sub>2</sub> | <i>p</i> -BQ      | •O <sub>2</sub> <sup>-</sup> | 12        |
| 3     |             | O <sub>2</sub> | AgNO <sub>3</sub> | e <sup>-</sup>               | 26        |
| 4     |             | O <sub>2</sub> | EDTA              | h <sup>+</sup>               | 58        |
| 5     |             | O <sub>2</sub> | IPA               | •OH                          | 83        |
| 6     |             | O <sub>2</sub> | 2-Methylfuran     | <sup>1</sup> O <sub>2</sub>  | 83        |
| 7     | Thioanisole | TBHP           | -                 | -                            | 97        |
| 8     |             | TBHP           | IPA               | •OH                          | 44        |
| 9     |             | TBHP           | AgNO <sub>3</sub> | e <sup>-</sup>               | 33        |
| 10    |             | TBHP           | EDTA              | h <sup>+</sup>               | 40        |
| 11    |             | TBHP           | <i>p</i> -BQ      | <sup>t</sup> BuOO•           | 59        |
| 12    |             | TBHP           | 2-Methylfuran     | <sup>1</sup> O <sub>2</sub>  | 95        |

<sup>a</sup> The reaction conditions were similar to those for the photocatalytic oxidation of benzylamine and thioanisole except that 1 mmol of the scavenger agent was added into the reaction system before visible light irradiation.

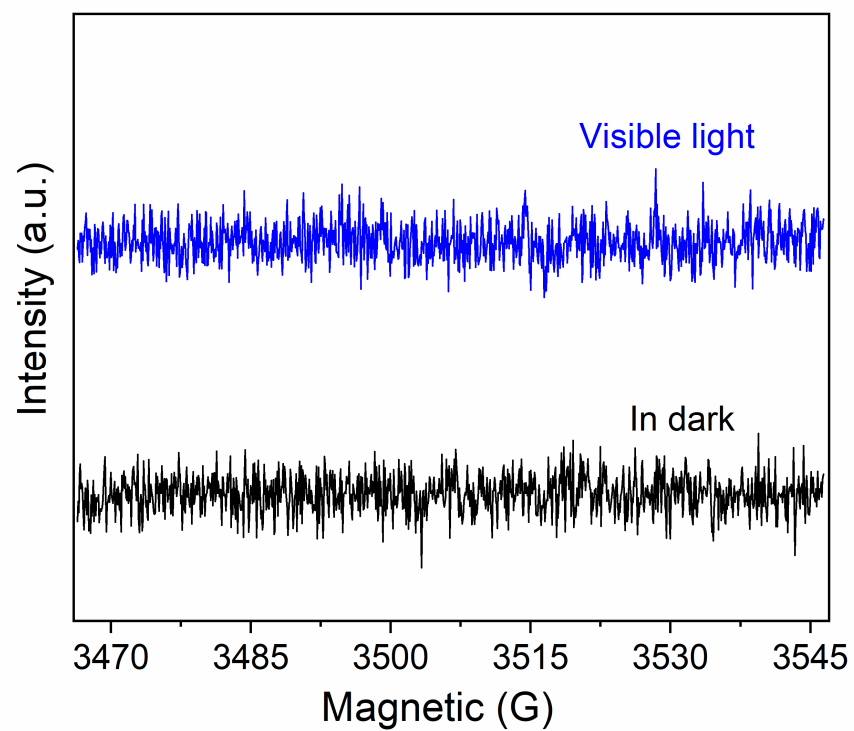

**Fig. S9.** EPR detection of the  $\cdot\text{OH}$  species trapped by DMPO in the photocatalytic oxidative coupling of benzylamine over BIT-66.

## References

- [1] D. Sun, L. Ye and Z. Li, *Appl. Catal. B: Environ.*, 2015, **164**, 428-432.
- [2] J. Shi, J. Zhang, T. Liang, D. Tan, X. Tan, Q. Wan, X. Cheng, B. Zhang, B. Han, L. Liu, F. Zhang and G. Chen, *ACS Appl. Mater. Interfaces*, 2019, **11**, 30953-30958.
- [3] H. Li, Y. Yang, C. He, L. Zeng and C. Duan, *ACS Catal.*, 2018, **9**, 422-430.
- [4] Y. Sha, J. Zhang, D. Tan, F. Zhang, X. Cheng, X. Tan, B. Zhang, B. Han, L. Zheng and J. Zhang, *Chem. Commun.*, 2020, **56**, 10754-10757.
- [5] F.J. Zhao, G. Zhang, Z. Ju, Y.X. Tan and D. Yuan, *Inorg. Chem.*, 2020, **59**, 3297-3303.
- [6] H. Wei, Z. Guo, X. Liang, P. Chen, H. Liu and H. Xing, *ACS Appl. Mater. Interfaces*, 2019, **11**, 3016-3023.
- [7] C. Xu, H. Liu, D. Li, J.H. Su and H.L. Jiang, *Chem. Sci.*, 2018, **9**, 3152-3158.
- [8] P. Chen, Z. Guo, X. Liu, H. Lv, Y. Che, R. Bai, Y. Chi and H. Xing, *J. Mater. Chem. A*, 2019, **7**, 27074-27080.
- [9] D. Zheng, E. Chen, C. Ye and X. Huang, *J. Mater. Chem. A*, 2019, **7**, 22084-22091.
- [10] Y. Liu, J. Zou, B. Guo, Y. Ren, Z. Wang, Y. Song, Y. Yu and L. Wu, *Langmuir*, 2020, **36**, 2199-2208.
- [11] X. Yan, Z. Shi, J. Jiao, C. Si and Q. Han, *Inorg. Chem.*, 2021, **60**, 16810-16816.
- [12] L. Wei and B. Ye, *ACS Appl. Mater. Interfaces*, 2019, **11**, 41448-41457.
- [13] X. Zou, D. Zhang, T. Luan, Q. Li, L. Li, P. Li and Y. Zhao, *ACS Appl. Mater. Interfaces*, 2021, **13**, 20137-20144.
- [14] D. Zhang, X. Zou, X. Wang, J. Su, T. Luan, W. Fan, P. Li and Y. Zhao, *ACS Appl.*



*Mater. Interfaces*, 2022, **14**, 23518-23526.

[15] D. Xie, S. Wang, S. Li, W. Yang and Y. Feng, *Catal. Sci. Technol.*, 2022, **12**, 3254-3260.

[16] C. Wang, Z. Xie, K.E. deKrafft and W. Lin, *J. Am. Chem. Soc.*, 2011, **133**, 13445-13454.

[17] J.A. Johnson, X. Zhang, T.C. Reeson, Y.S. Chen and J. Zhang, *J. Am. Chem. Soc.*, 2014, **136**, 15881-15884.
